# Supplementary material
Source: publisher figshare collection journal article supplement (https://sage.figshare.com/ndownloader/files/18080279)
Supplement: Supplementary file 1 [file 18080279]

**Supplemental Legend**

Supplemental material, Supplemental Table S1, for manuscript entitled, *Recent Trends in the Surgical Management of Vestibular Schwannoma*, by Mitchell Dunklebarger, Kalins Banerjee, Vijay A. Patel, Tom Shokri, Xiang Zhan and Huseyin Isildak, in Annals of Otology, Rhinology and Laryngology.
